# Supplementary material for: Brain injury expands the numbers of neural stem cells and progenitors in the SVZ by enhancing their responsiveness to EGF
Source: PubMed Central journal article supplement — ASN Neuro. 2009 May 20;1(2):e00009. doi: 10.1042/AN20090002 (PMC2695583; doi:10.1042/an20090002), 2009-05-20
Supplement: an001e009add.pdf [file an001e009add.pdf]

# Brain injury expands the numbers of neural stem cells and progenitors in the SVZ by enhancing their responsiveness to EGF

Dhivyaa Alagappan\*, Deborah A Lazzarino\*, Ryan J Felling\*, Murugabaskar Balan<sup>†</sup>, Sergei V Kotenko<sup>†</sup> and Steven W Levison\*<sup>1</sup>

\*Department of Neurology and Neuroscience, UMDNJ-New Jersey Medical School, Newark, NJ 07103, U.S.A.

<sup>†</sup>Department of Biochemistry and Molecular Biology, UMDNJ-New Jersey Medical School, Newark, NJ 07103, U.S.A.

Cite this article as: Alagappan D, Lazzarino DA, Felling RJ, Balan M, Kotenko SV and Levison SW (2009) Brain injury expands the numbers of neural stem cells and progenitors in the SVZ by enhancing their responsiveness to EGF. ASN NEURO 1(2):art:e00009.doi:10.1042/AN20090002

## SUPPLEMENTARY ONLINE DATA

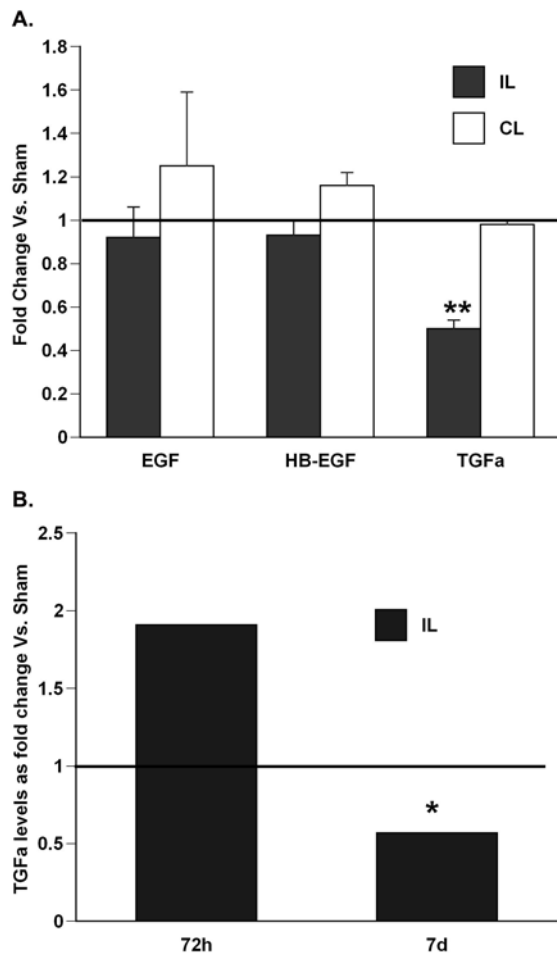

Received 20 January 2009/13 April 2009; accepted 17 April 2009

Published as Immediate Publication 17 April 2009, doi 10.1042/AN20090002

**Figure S1 Expression of EGFR ligands during recovery from neonatal H/I**  
**(A)** Real-time PCR using primers specific for EGFR ligands, EGF, HB-EGF and TGF- $\alpha$  and normalized to expression of 18S after 72 h recovery. **(B)** Real-time PCR using primers specific for TGF- $\alpha$  and normalized to expression of 18S after 72 h and 7 day recovery.  $n=6$  for ipsilateral, contralateral and control. \* $P<0.05$ , as measured using REST.

<sup>1</sup>To whom correspondence should be addressed (email [steve.levison@umdnj.edu](mailto:steve.levison@umdnj.edu)).

© 2009 The Author(s) This is an Open Access article distributed under the terms of the Creative Commons Attribution Non-Commercial Licence (<http://creativecommons.org/licenses/by-nc/2.5/>) which permits unrestricted non-commercial use, distribution and reproduction in any medium, provided the original work is properly cited.
